# Supplementary material for: The influence of stochastic temperature fluctuations in shaping the physiological performance of the California mussel,Mytilus californianus
Source: Oxford University Press journal article supplement (doi:10.1242/jeb.243729), 2022-06-24
Supplement: jeb243729supp.pdf [file jeb243729supp.pdf]

**Table S1. Comparisons of generalized additive mixed models (GAMM) of heart rate as a function of temperature,  $f(T)$ . Tidal treatments were referenced to the curve of Submerged treatment and the degree of deviation was measured.**

| Acclimation treatment                   | e.d.f | F-value | P-value |
|-----------------------------------------|-------|---------|---------|
| $f(T)$ for Submerged                    | 8.307 | 165.60  | <0.0001 |
| Deviation from $f(T)$ for Air           | 8.103 | 28.91   | <0.0001 |
| Deviation from $f(T)$ for Predictable   | 8.410 | 31.86   | <0.0001 |
| Deviation from $f(T)$ for Unpredictable | 8.604 | 38.41   | <0.0001 |
| Deviation from $f(T)$ for Field         | 7.816 | 26.34   | <0.0001 |
| e.d.f., effective degrees of freedom    |       |         |         |
